# Supplementary material for: Plasma proteome and metabolites profiling reveals dynamics for adverse events and responses after neoadjuvant radiochemotherapy plus PDL1 blockade in microsatellite-stable locally advanced rectal cancer: A prospective longitudinal study
Source: Research Square preprint supplement (doi:10.21203/rs.3.rs-5509842/v1), 2025-05-07
Supplement: Supplementary file 1 [file 08f181488be99df2e0b903b2.docx]

Supplementary materials

| **Table 1: Baseline characteristics of responder and non-responder LARC patients** | | | |
| --- | --- | --- | --- |
| **Characteristics** | **Non-pCR (n=30)** | **pCR (n=20)** | **P-value** |
| **Gender** |  |  | 0.797 |
| Male | 22 (73.3%) | 14 (70.0%) |  |
| Female | 8 (26.7%) | 6 (30.0%) |  |
| **Age** |  |  | 0.643 |
| ≥60 | 13 (43.4%) | 10 (50.0%) |  |
| ＜60 | 17 (56.7%) | 10 (50.0%) |  |
| **cT stage** |  |  | 0.409 |
| T3 | 29 (96.7%) | 20 (100%) |  |
| T4 | 1 (3.3%) | 0 (0%) |  |
| **cN stage** |  |  | 0.774 |
| N0 | 6 (20.0%) | 5 (25.0%) |  |
| N1 | 21 (70.0%) | 14 (70.0%) |  |
| N2 | 3 (10.0%) | 1 (5.0%) |  |
| **RAS/RAF status** |  |  | 0.419 |
| Mutant | 13 (43.3%) | 11 (55.0%) |  |
| Wide type | 17 (56.7%) | 9 (45.0%) |  |


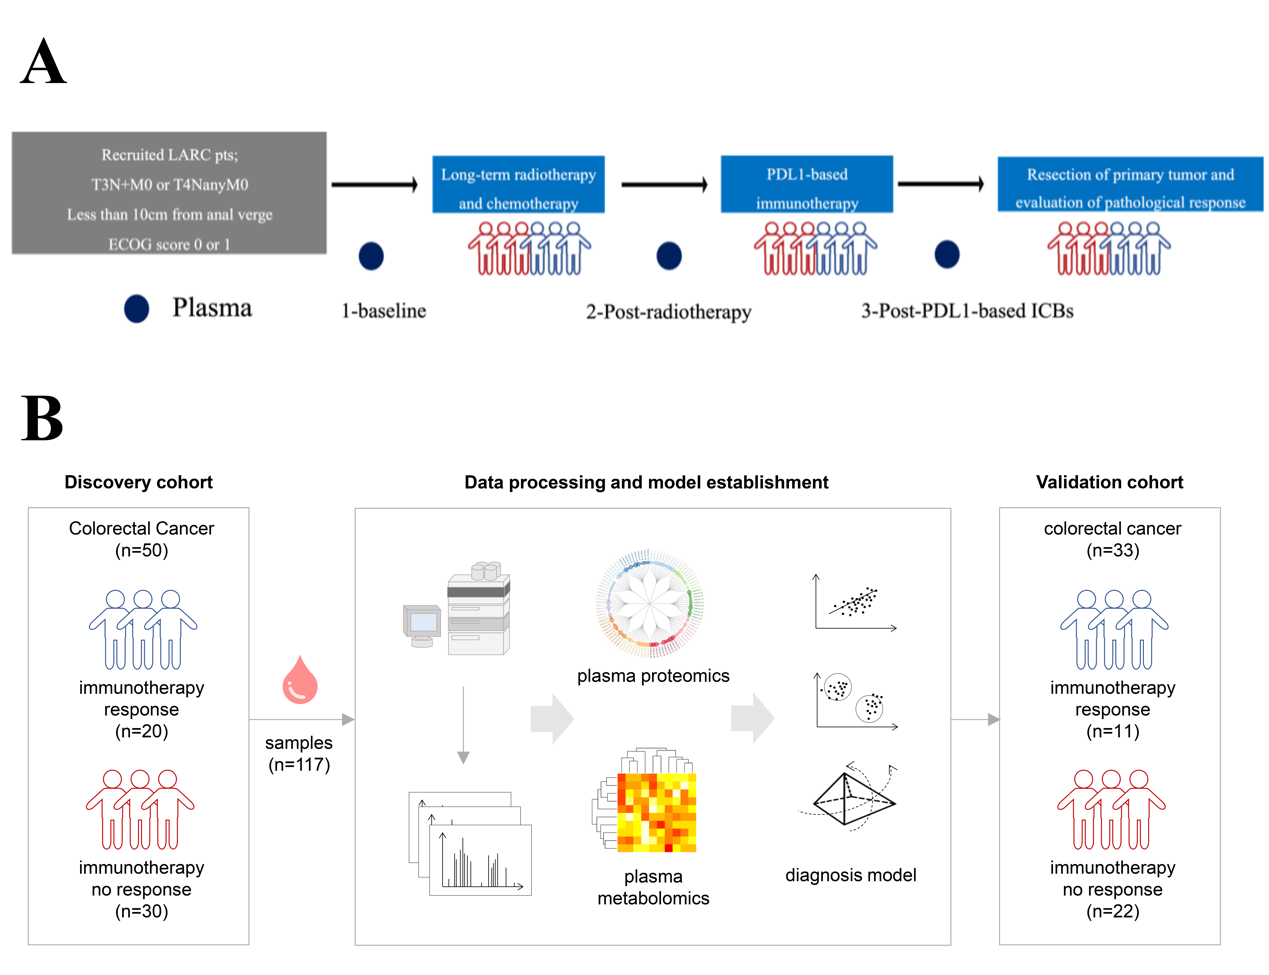


**Figure S1:** **A,** recruitment and samples collection of MSS rectal cancer patients in this study. Three time-point for plasma samples collection was separately baseline, post-radiotherapy and post-PDL1 based immunotherapy. **B,** workflow of this study was shown, in this study, the plasma proteomics and metabolomics were performed and analyzed for possible biomarker selections. **Aberration**: MSS, microsatellite stable; PDL1, Programmed cell death 1 ligand 1.


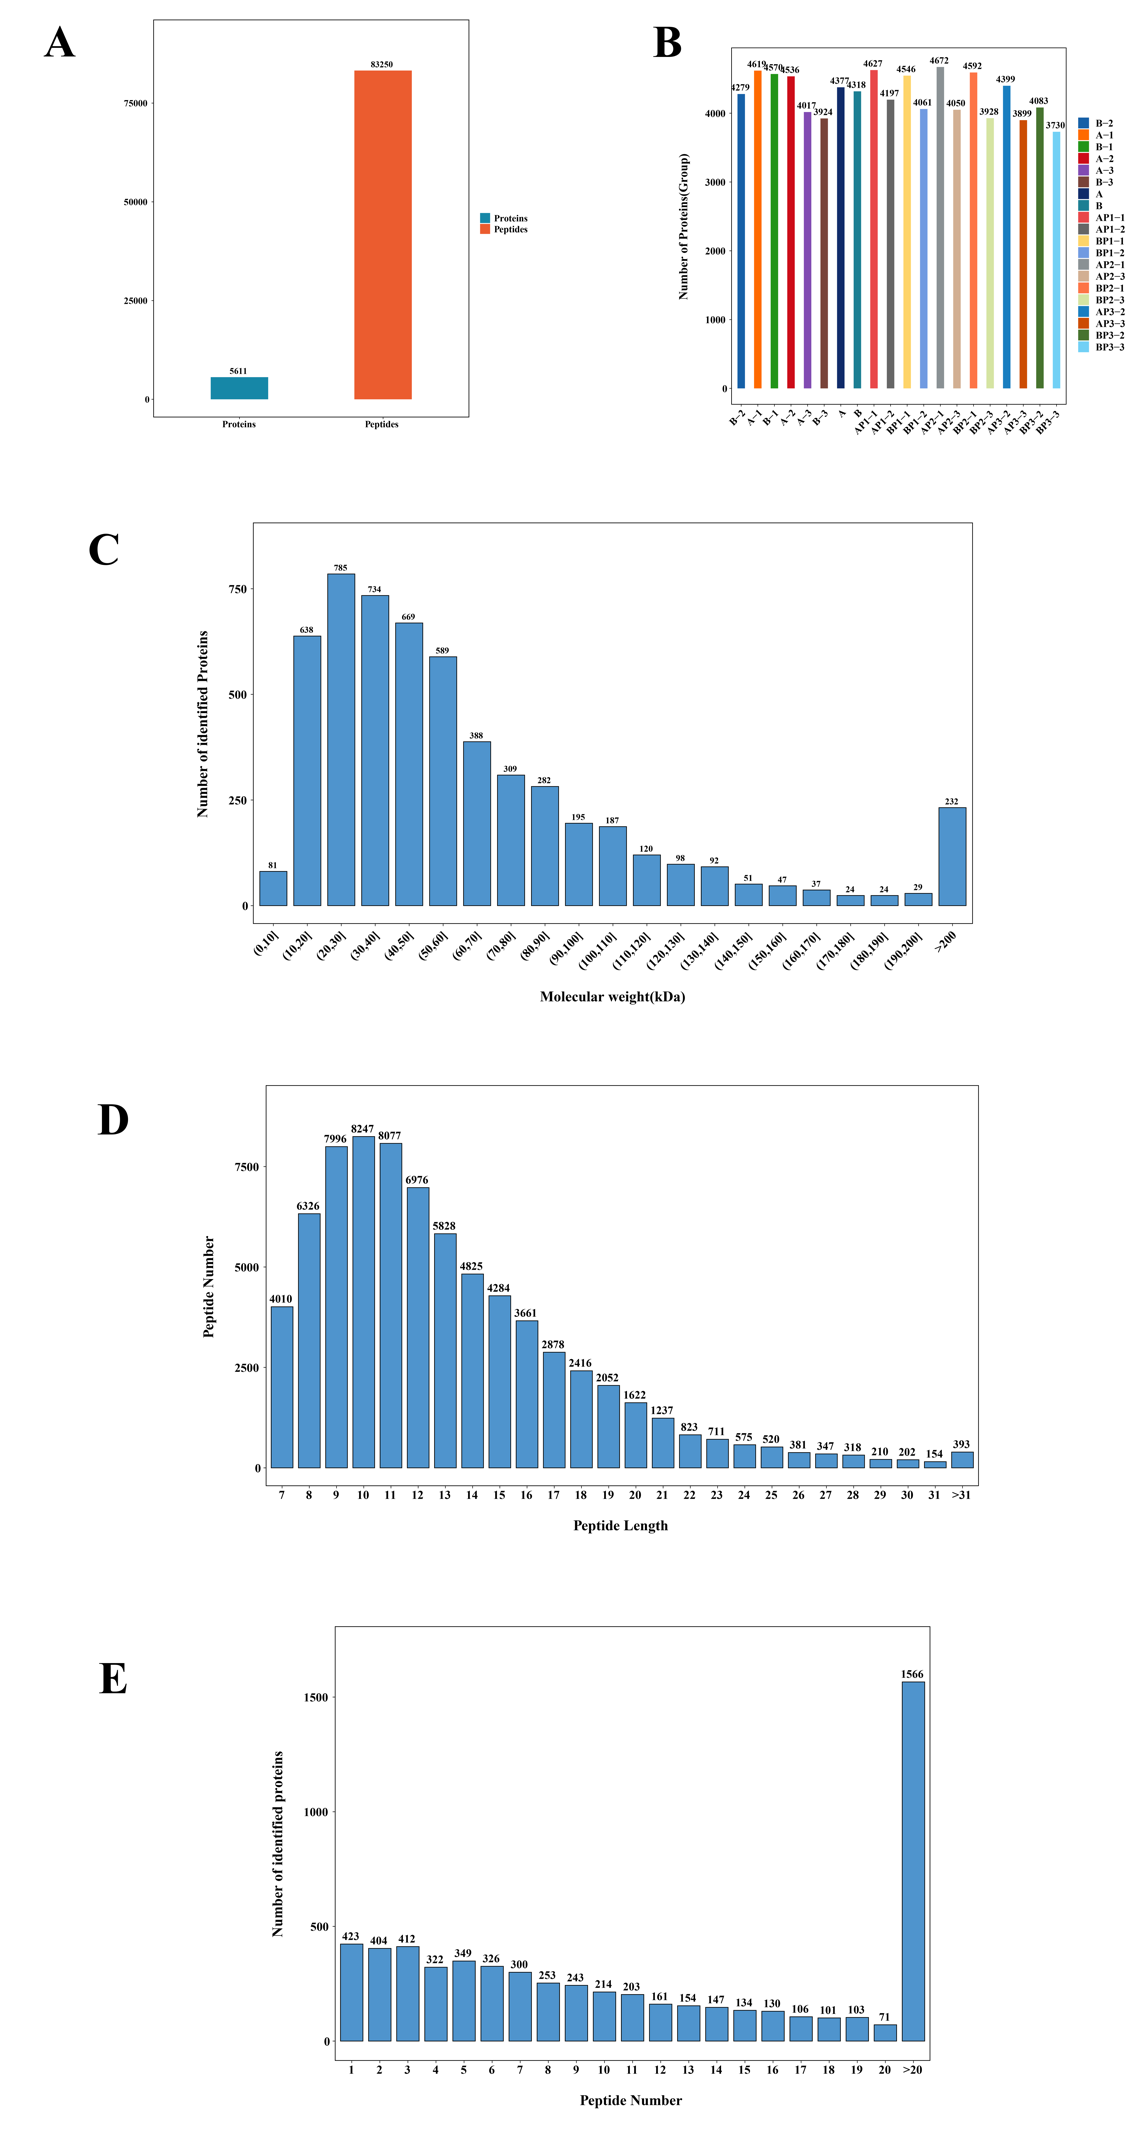


**Figure S2:** **A,** for plasma proteomics analysis, A total of 5611 gene products (GPs) were identified in all the plasma samples of the recruited cohort, of which 83250 peptide GPs were identified. **B,** separate number of proteins and peptides were shown in each group. Data related to **Supplementary data 1** and **data 2**). C to E, the molecular weights, peptide lengths and numbers are also shown in **Figure S2C** to **S2E**.


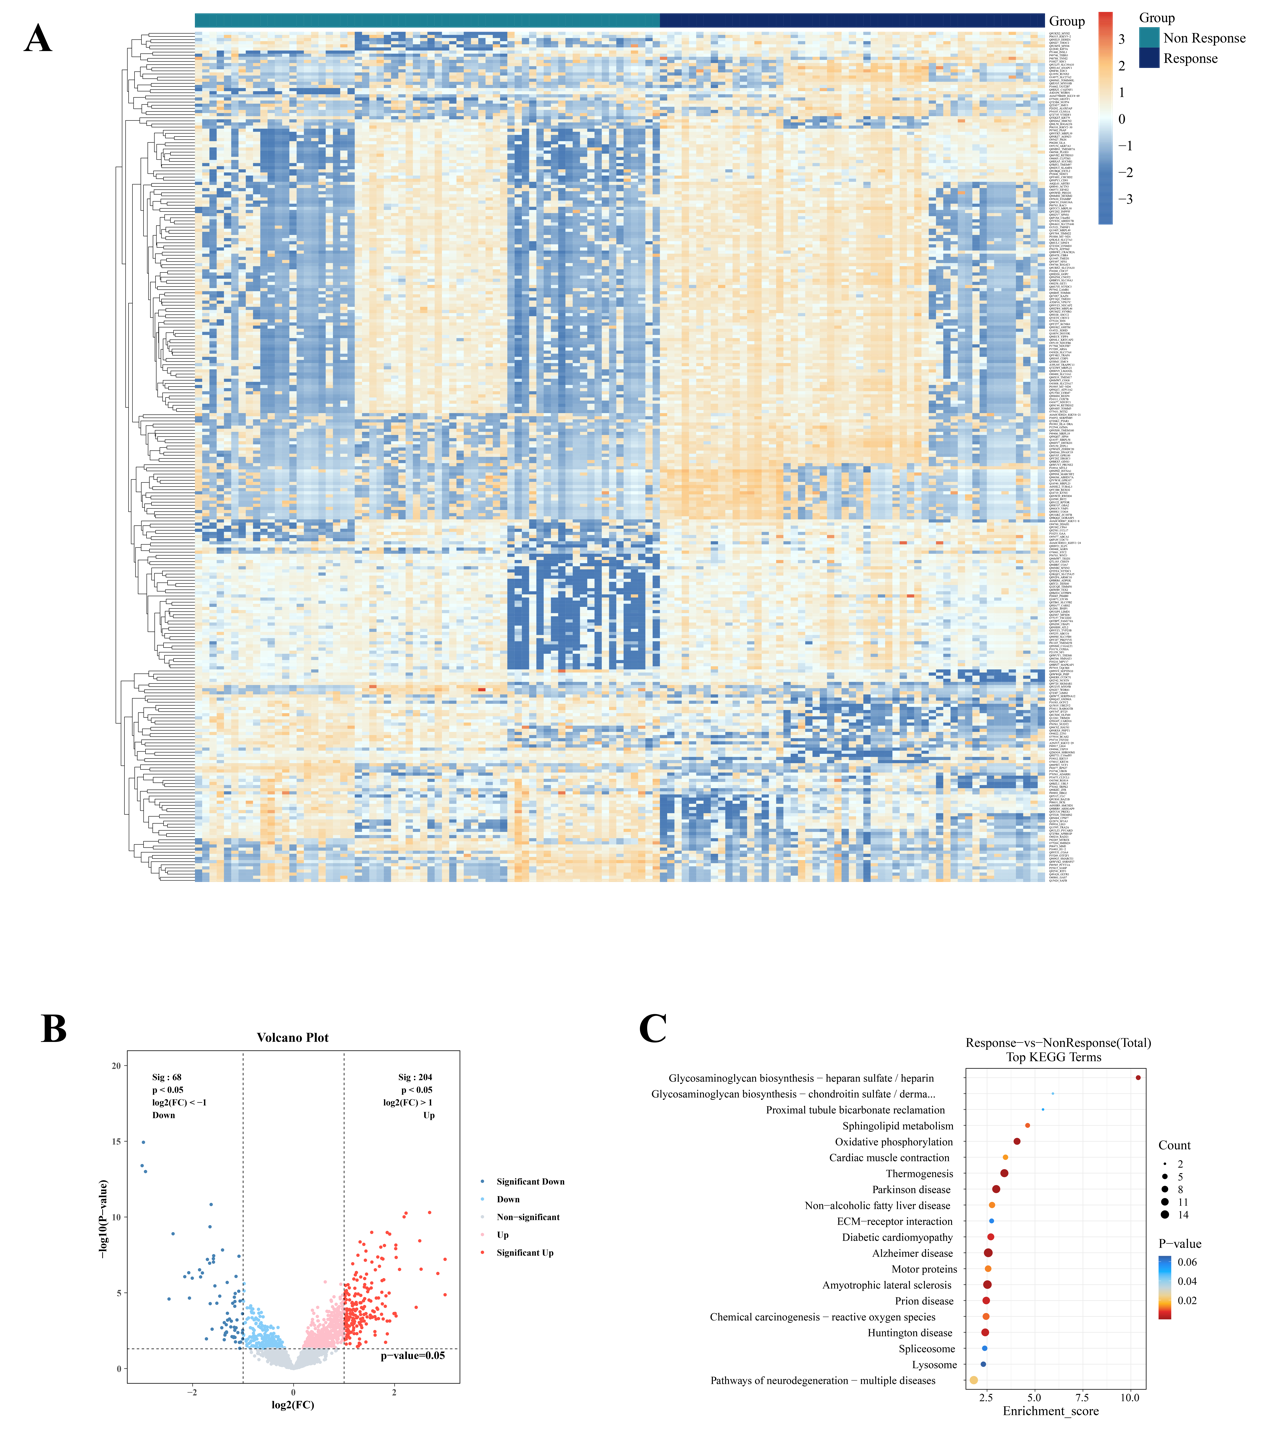


**Figure S3:** **A,** Heatmap analysis revealed the significant proteins between response and non-response samples. **B,** 204 proteins were significantly upregulated and that 68 were significantly downregulated and data related to **Supplementary data 3** according to the protein classes in the Human Protein Atlas (HPA) database. **C,** the KEGG analysis revealed genes related to neutrophil degranulation and the innate immune system, among other activities (adjusted P value < 0.05).


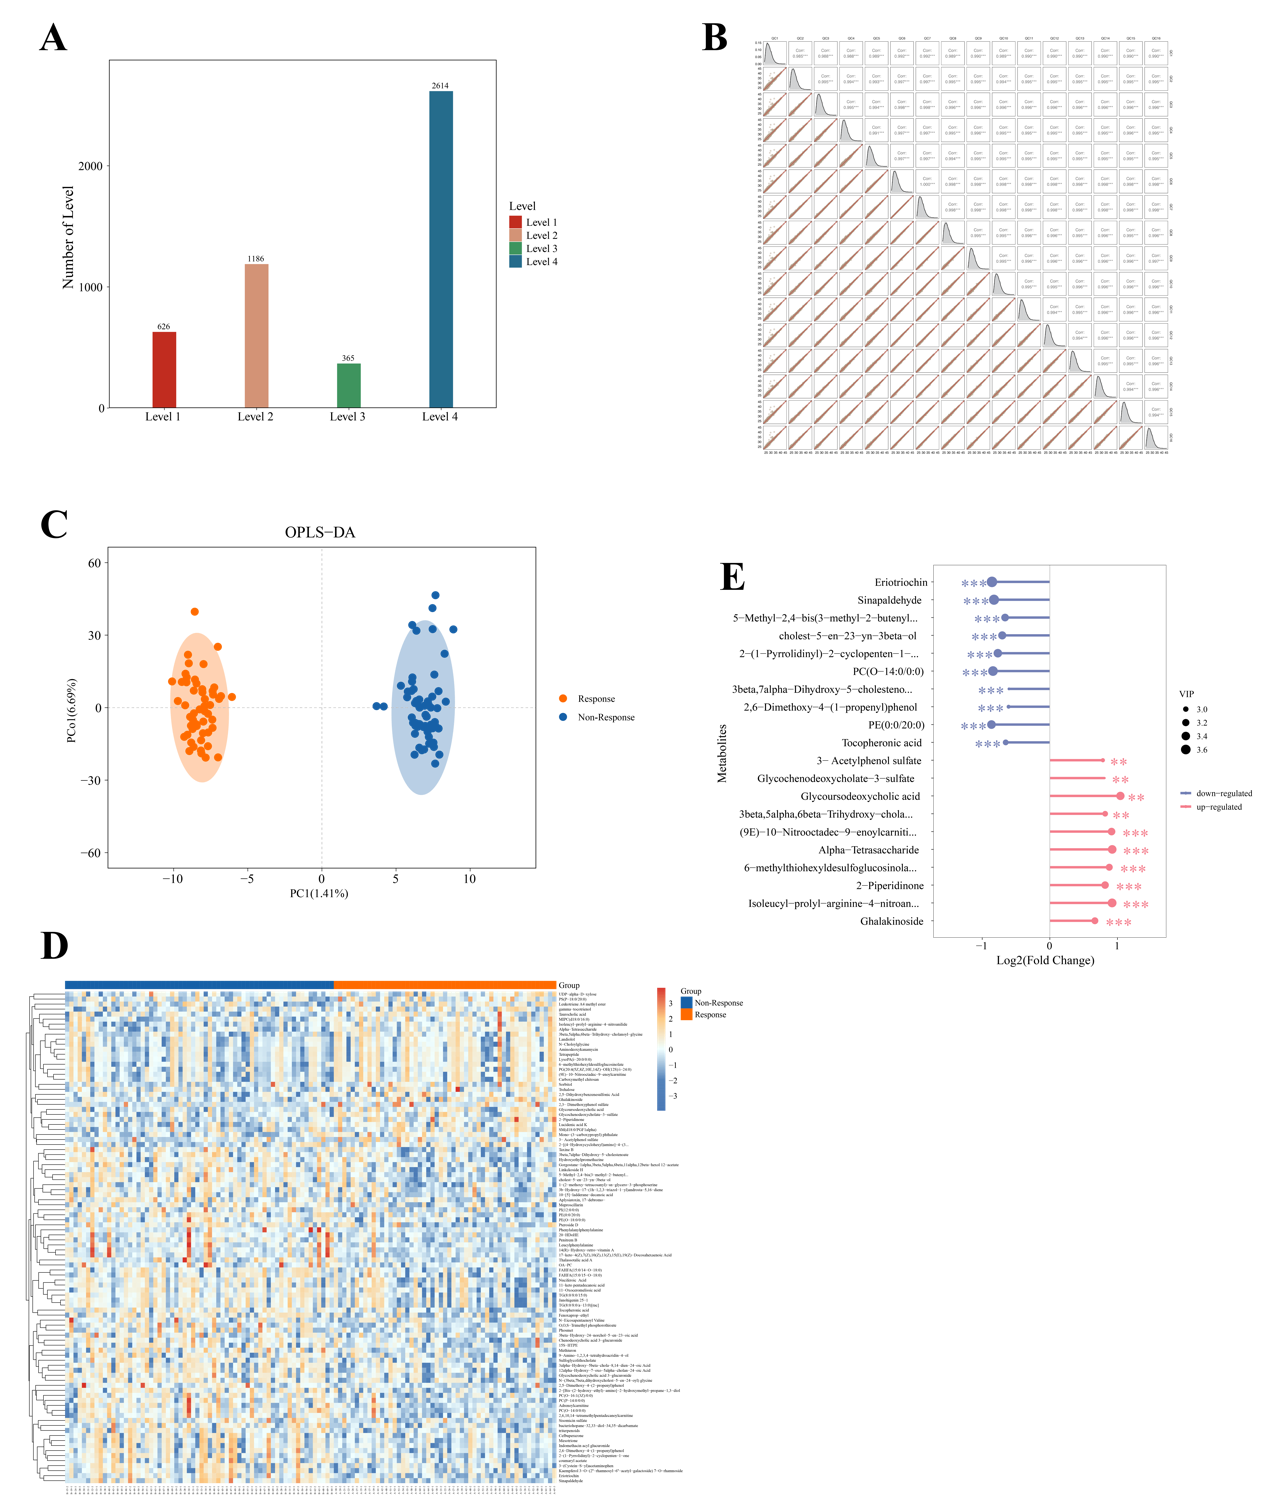


**Figure S4:** **A,** for plasma metabolomics analysis, four levels and a total of 4,791 endogenous metabolites were identified. **B,** the results of the quality control analysis are shown. **C,** OPLS-DA analyses revealed that the plasma metabolome was significantly different between the response and nonresponse cohorts. **D,** this study conducted a heatmap comparison to identify metabolites with significantly differential peaks between different response groups and data related to **Supplementary data 4**. **E,** Differential plasma metabolites with consistent shifts across the response and nonresponse cohorts were revealed.


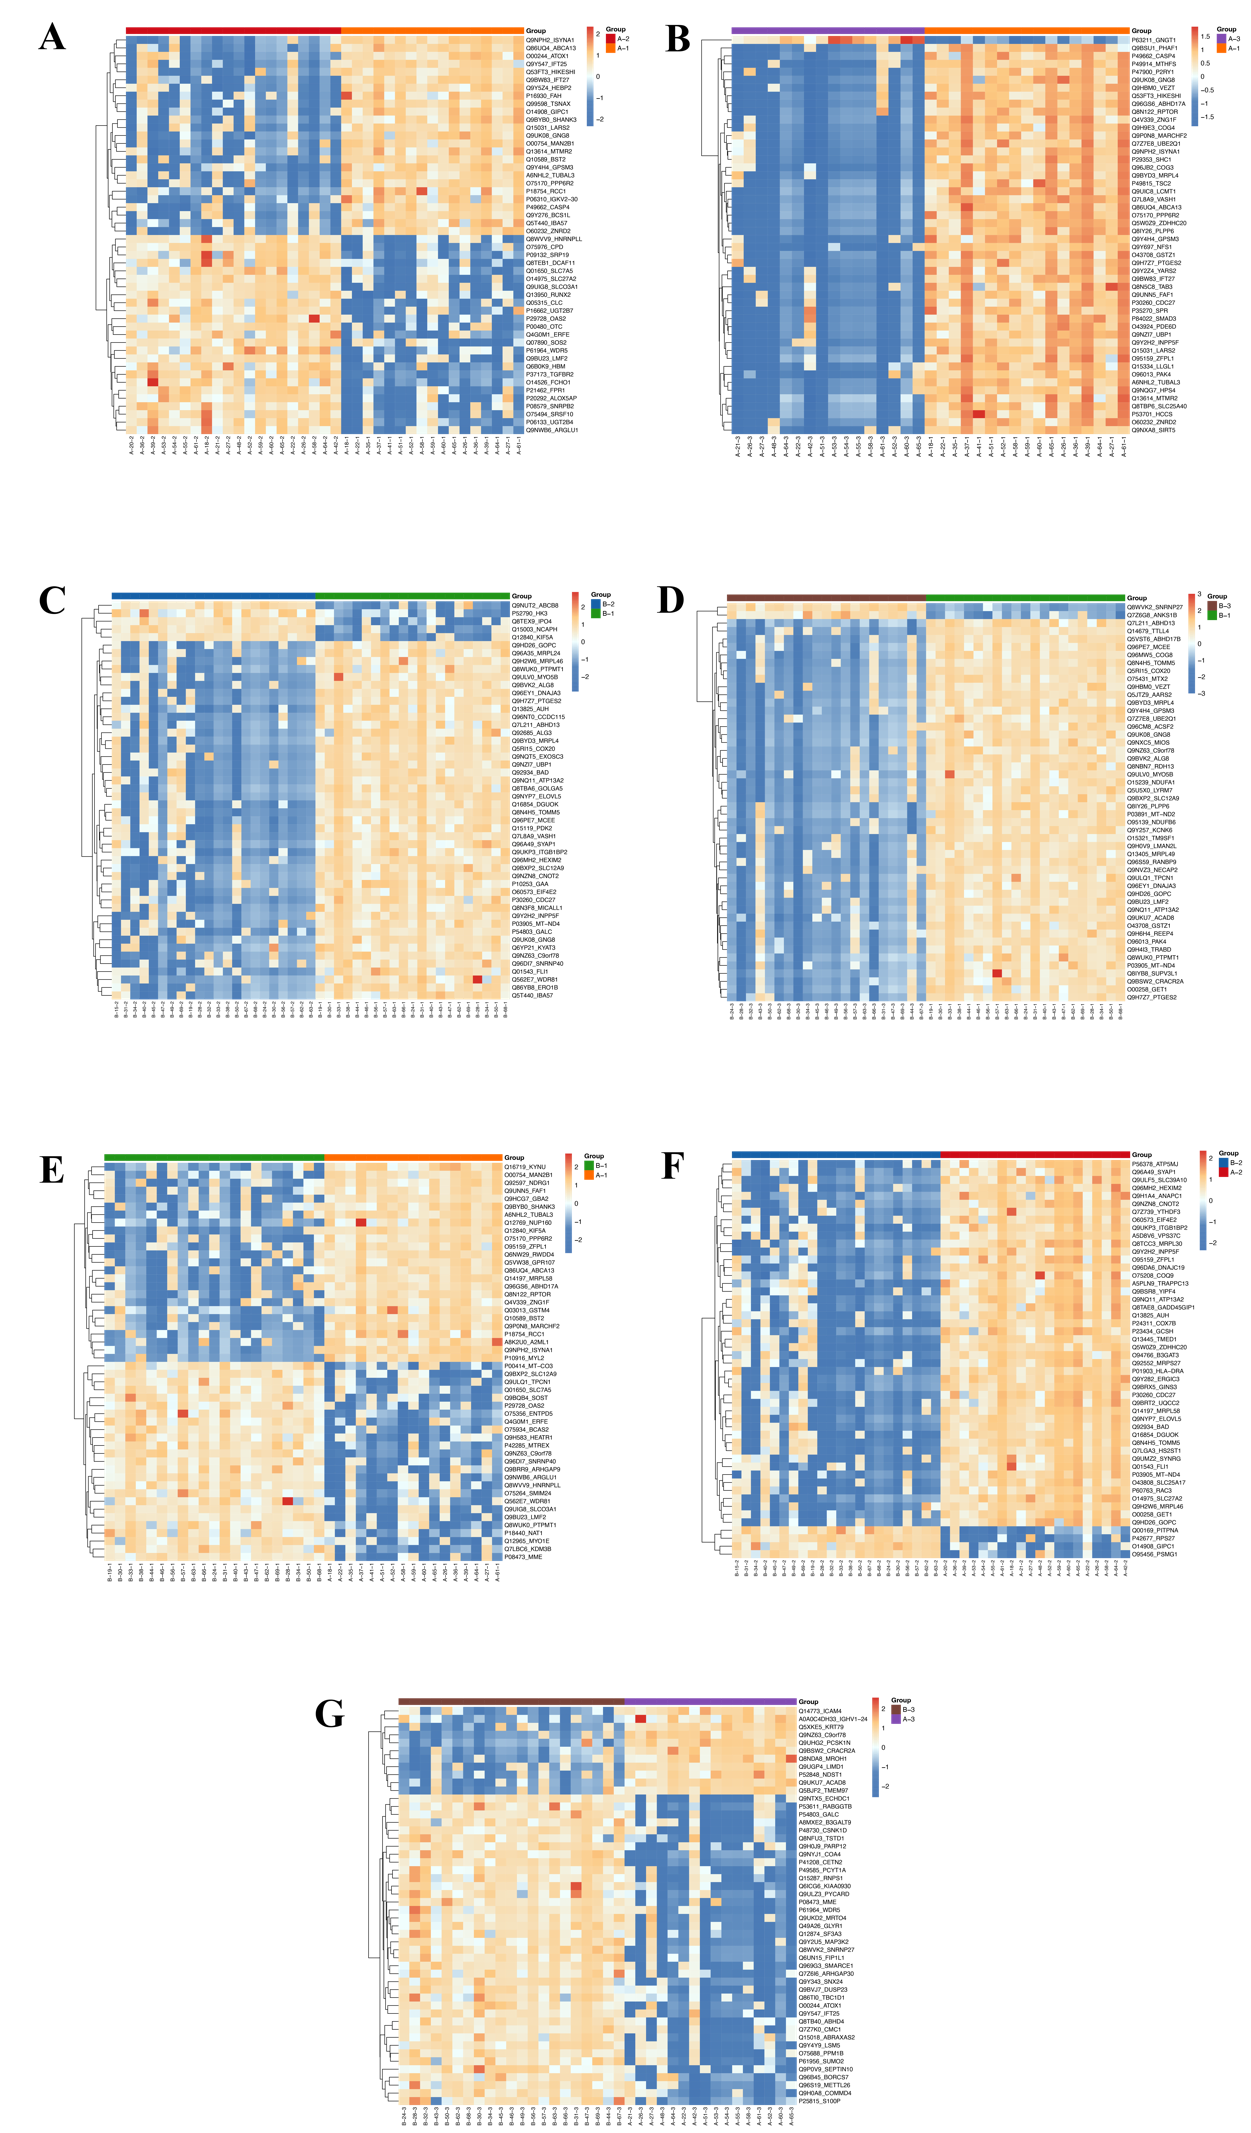


**Figure S5:** plasma proteomics analysis for different proteins between response and nonresponse samples at baseline, post-radiotherapy and post-immunotherapy stages.


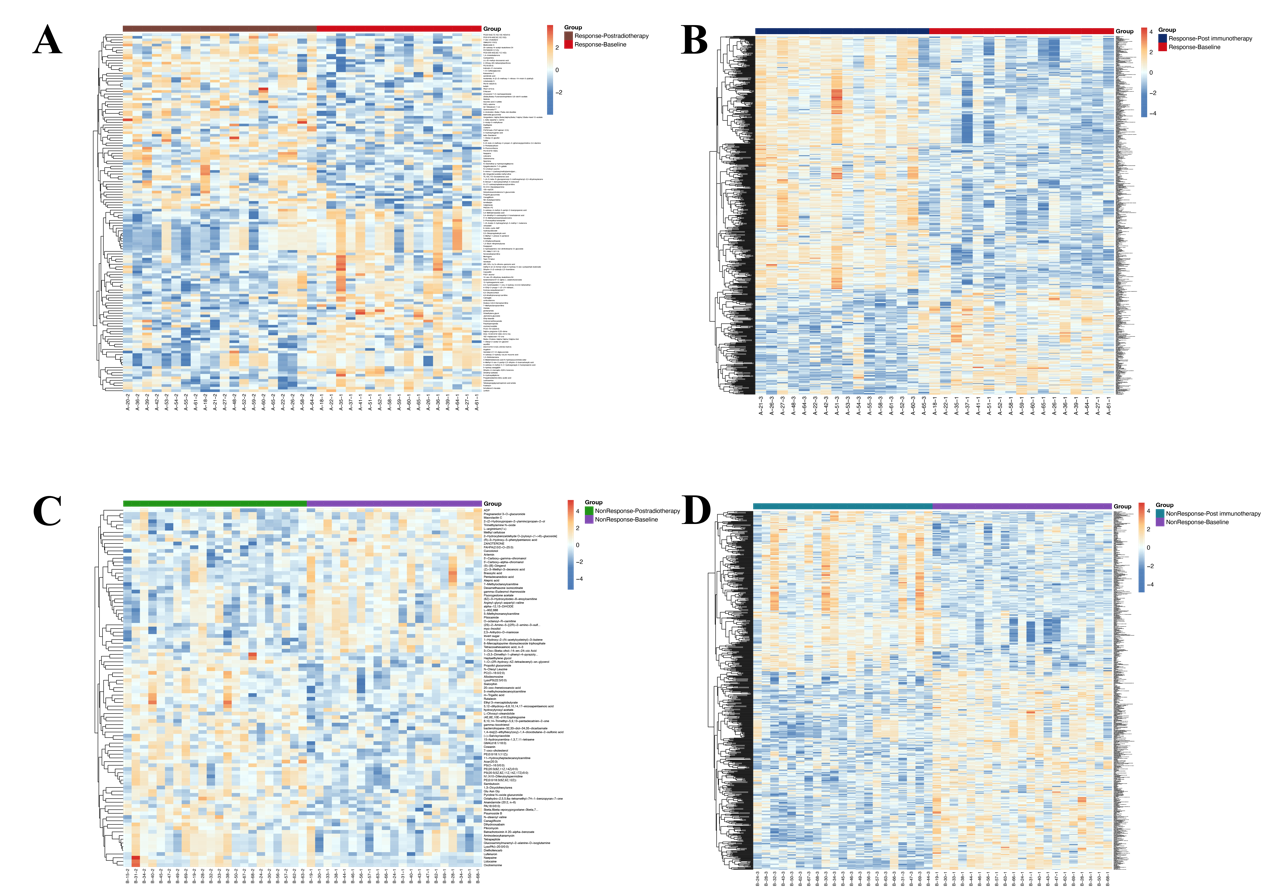


**Figure S6:** plasma metabolomics analysis for different metabolites between response and nonresponse samples at baseline, post-radiotherapy and post-immunotherapy stages.


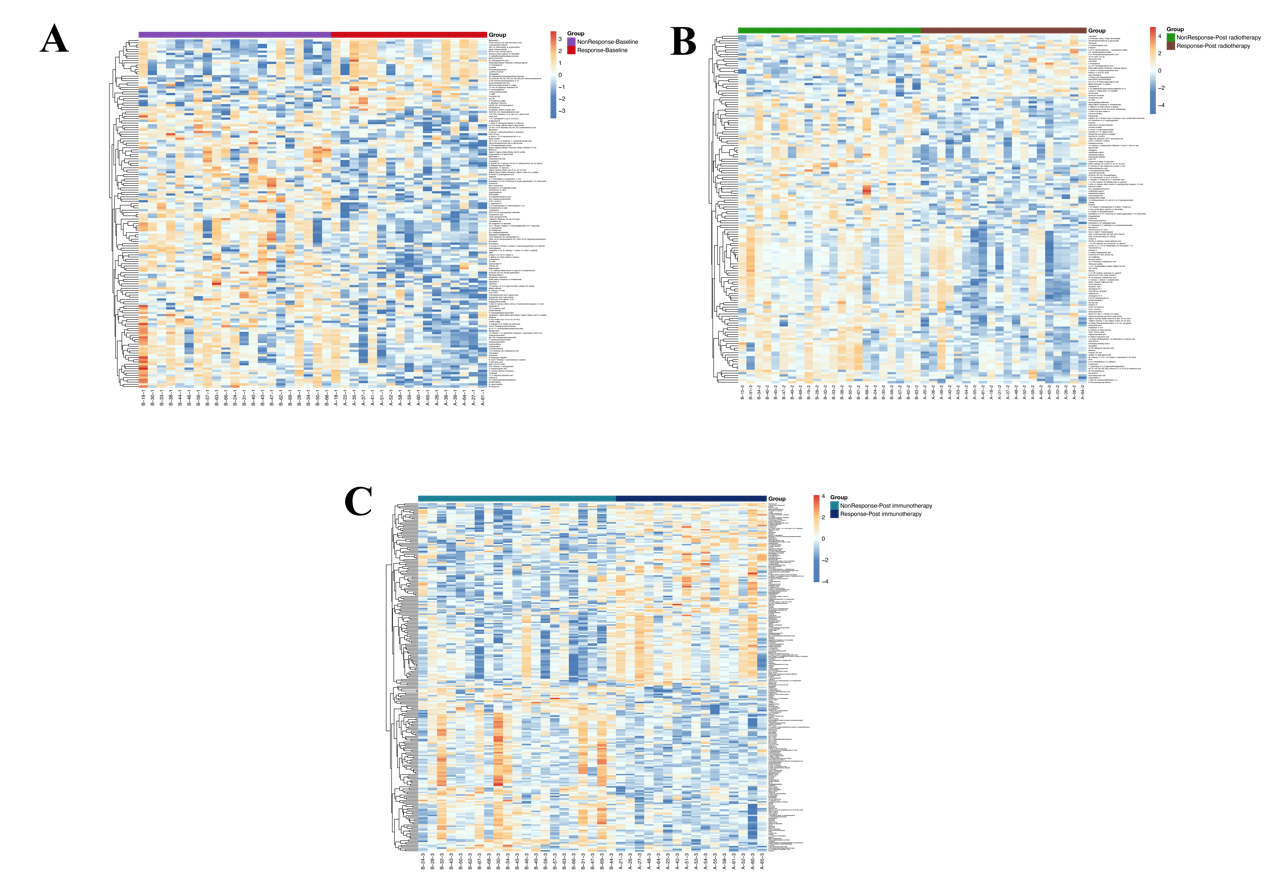


**Figure S7:** integrated analysis of metabolomics and proteomics in this study.


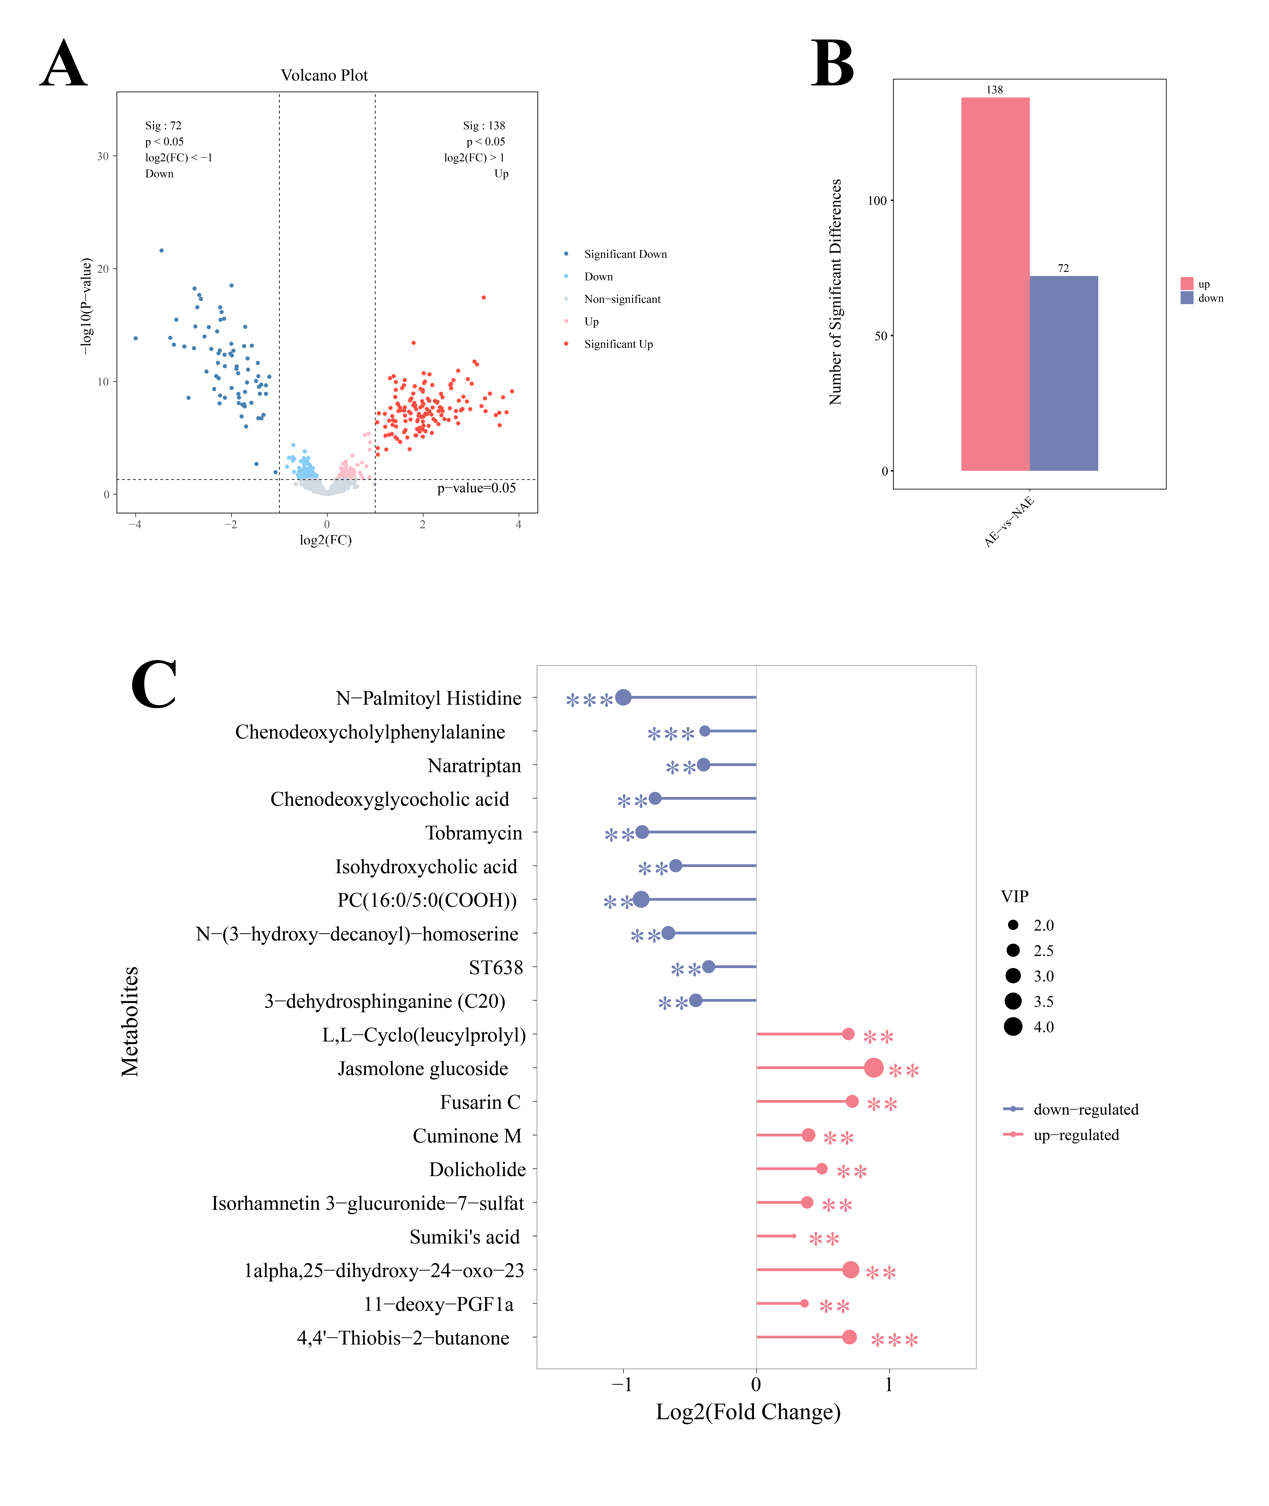


**Figure S8: A** and **B,** for analysis of AE and NAE samples, volcano map for significantly expressed proteins was shown in **Figure S8A-S8B** and data related to **Supplementary data 9**. **C,** metabolite alterations between the AE and NAE cohorts**,** including alterations in *N-Palmitoyl Histidine*, *Chenodeoxycholylphenylalanine*, *4,4'-Thiobis-2-butanone*, *Naratriptan*, *Chenodeoxyglycocholic acid* and *11-deoxy-PGF1a* were shown and data related to **Supplementary data 10**.
