# Supplementary material for: Plasma proteome and metabolites profiling reveals dynamics for adverse events and responses after neoadjuvant radiochemotherapy plus PDL1 blockade in microsatellite-stable locally advanced rectal cancer: A prospective longitudinal study
Source: Research Square preprint supplement (doi:10.21203/rs.3.rs-5509842/v1), 2025-05-07
Supplement: Supplementary file 2 [file 0fbc1bb00c09fabcd12b7d10.xlsx]

## Sheet: Protein quantitation
Accession
