# Supplementary material for: Plasma proteome and metabolites profiling reveals dynamics for adverse events and responses after neoadjuvant radiochemotherapy plus PDL1 blockade in microsatellite-stable locally advanced rectal cancer: A prospective longitudinal study
Source: Research Square preprint supplement (doi:10.21203/rs.3.rs-5509842/v1), 2025-05-07
Supplement: Supplementary file 3 [file 3c1bab0843f39551e917e4ea.xlsx]

## Sheet: 缺失值数据矩阵
ID

## Sheet: 数据矩阵
ID

## Sheet: 分组
Sample

## Sheet: 比较
比较组
