# Supplementary material for: Plasma proteome and metabolites profiling reveals dynamics for adverse events and responses after neoadjuvant radiochemotherapy plus PDL1 blockade in microsatellite-stable locally advanced rectal cancer: A prospective longitudinal study
Source: Research Square preprint supplement (doi:10.21203/rs.3.rs-5509842/v1), 2025-05-07
Supplement: Supplementary file 4 [file 66709c3a06043c93a7baea58.xlsx]

## Sheet: Peptides
ProteinGroups
