# Supplementary material for: Plasma proteome and metabolites profiling reveals dynamics for adverse events and responses after neoadjuvant radiochemotherapy plus PDL1 blockade in microsatellite-stable locally advanced rectal cancer: A prospective longitudinal study
Source: Research Square preprint supplement (doi:10.21203/rs.3.rs-5509842/v1), 2025-05-07
Supplement: Supplementary file 5 [file 781cf58f820bca349b813559.xlsx]

## Sheet: 差异表达矩阵
Accession

## Sheet: 差异表达矩阵(未筛选)
Accession
